# Supplementary material for: Comparison of SCAphoid fracture osteosynthesis by MAGnesium-based headless Herbert screws with titanium Herbert screws: protocol for the randomized controlled SCAMAG clinical trial
Source: Springer Nature journal article supplement (doi:10.1186/s12891-019-2723-9), 2019-08-06

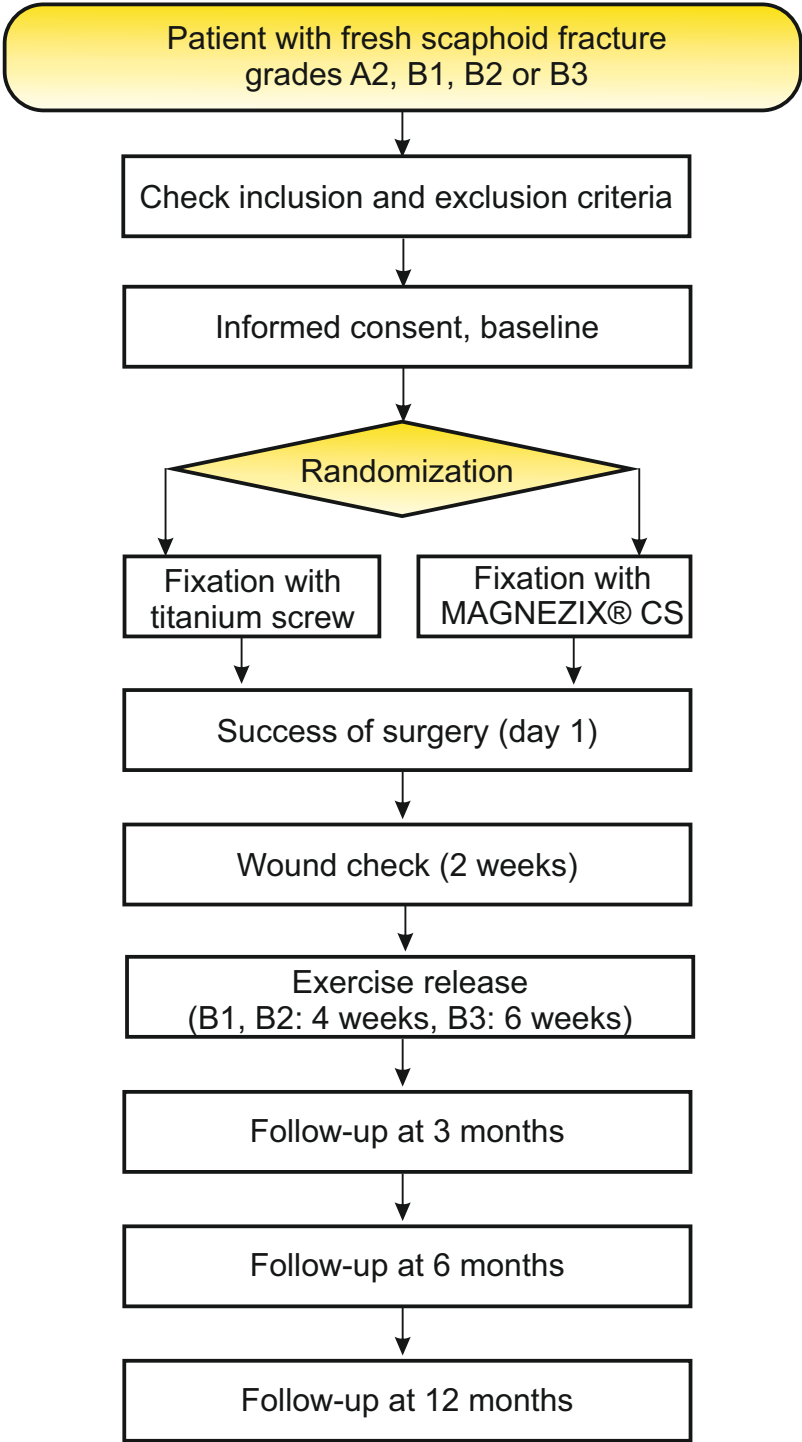

Supplement: MOESM1 [file 17043522]
